# Supplementary material for: Impact of the COVID-19 pandemic on healthcare resource utilization across selected disease areas in the USA
Source: Atypon-hosted journal article supplement (doi:10.2217/cer-2022-0059), 2022-06-14
Supplement: supplementary materials (4).docx [file supplementary%20materials%20(4).docx]

|  | **Wet AMD** | | | | **Relapsing MS** | | | | **Psoriasis** | | | | **MDD** | | | | **High cholesterol** | | | | **CHF** | | | | **ASCVD** | | | |
| --- | --- | --- | --- | --- | --- | --- | --- | --- | --- | --- | --- | --- | --- | --- | --- | --- | --- | --- | --- | --- | --- | --- | --- | --- | --- | --- | --- | --- |
|  | Pre-pandemic | | Pandemic | | Pre-pandemic | | Pandemic | | Pre-pandemic | | Pandemic | | Pre-pandemic | | Pandemic | | Pre-pandemic | | Pandemic | | Pre-pandemic | | Pandemic | | Pre-pandemic | | Pandemic | |
| **Age** | Total (N) | % | Total (N) | % | Total (N) | % | Total (N) | % | Total (N) | % | Total (N) | % | Total (N) | % | Total (N) | % | Total (N) | % | Total (N) | % | Total (N) | % | Total (N) | % | Total (N) | % | Total (N) | % |
| *18-29* | 1 | 0.01 | 13 | 0.07 | 199 | 2.41 | 173 | 2.11 | 1,502 | 4.32 | 1,375 | 3.98 | 23,137 | 7.35 | 23,260 | 7.41 | 5,457 | 0.86 | 4,741 | 0.76 | 102 | 0.11 | 82 | 0.09 | 826 | 0.19 | 751 | 0.18 |
| *30-39* | 16 | 0.08 | 43 | 0.22 | 677 | 8.19 | 603 | 7.36 | 2,937 | 8.45 | 2,731 | 7.91 | 23,743 | 7.54 | 22,760 | 7.25 | 17,652 | 2.79 | 15,505 | 2.47 | 387 | 0.41 | 346 | 0.38 | 2,678 | 0.63 | 2,288 | 0.54 |
| *40-49* | 47 | 0.24 | 148 | 0.76 | 1,318 | 15.94 | 1,218 | 14.88 | 4,100 | 11.80 | 3,959 | 11.47 | 29,507 | 9.37 | 28,514 | 9.09 | 42,094 | 6.65 | 38,393 | 6.12 | 1,521 | 1.63 | 1,318 | 1.43 | 9,938 | 2.34 | 8,641 | 2.05 |
| *50-59* | 180 | 0.92 | 1,315 | 6.77 | 1,983 | 23.99 | 1,923 | 23.49 | 5,887 | 16.94 | 5,640 | 16.34 | 43,942 | 13.96 | 41,708 | 13.29 | 84,320 | 13.33 | 78,989 | 12.60 | 5,685 | 6.09 | 4,968 | 5.40 | 34,382 | 8.08 | 30,483 | 7.25 |
| *60-69* | 1,602 | 8.16 | 5,940 | 30.58 | 2,363 | 28.59 | 2,362 | 28.85 | 8,689 | 25 | 8,119 | 23.51 | 75,996 | 24.14 | 70,934 | 22.61 | 177,401 | 28.05 | 160,798 | 25.65 | 19,187 | 20.56 | 17,123 | 18.63 | 106,749 | 25.09 | 94,530 | 22.48 |
| *70-79* | 6,485 | 33.05 | 11,964 | 61.60 | 1,404 | 16.99 | 1,520 | 18.56 | 8,687 | 25 | 9,299 | 26.93 | 78,679 | 24.99 | 82,252 | 26.21 | 213,220 | 33.71 | 223,163 | 35.60 | 34,497 | 36.96 | 33,789 | 36.75 | 167,938 | 39.47 | 169,882 | 40.39 |
| *80+* | 11,291 | 57.54 |  |  | 322 | 3.90 | 389 | 4.75 | 2,948 | 8.48 | 3,404 | 9.86 | 39,868 | 12.66 | 44,358 | 14.14 | 92,412 | 14.61 | 105,343 | 16.80 | 31,955 | 34.24 | 34,307 | 37.32 | 102,939 | 24.20 | 114,008 | 27.11 |
| **Sex** |  |  |  |  |  |  |  |  |  |  |  |  |  |  |  |  |  |  |  |  |  |  |  |  |  |  |  |  |
| *FEMALE* | 12,389 | 63.14 |  |  | 6,210 | 74.98 |  |  | 19,332 | 54.45 |  |  | 226,476 | 68.89 |  |  | 336,250 | 52.95 |  |  | 47,546 | 50.93 |  |  | 209,283 | 49.17 |  |  |
| *MALE* | 7,234 | 36.86 |  |  | 2,072 | 25.02 |  |  | 16,172 | 45.55 |  |  | 102,289 | 31.11 |  |  | 298,783 | 47.05 |  |  | 45,811 | 49.07 |  |  | 216,368 | 50.83 |  |  |
| **Region** |  |  |  |  |  |  |  |  |  |  |  |  |  |  |  |  |  |  |  |  |  |  |  |  |  |  |  |  |
| *MIDWEST* | 4,506 | 23.09 | 4,503 | 23.31 | 1,992 | 24.21 | 1,974 | 24.25 | 8,312 | 23.53 | 8,236 | 23.54 | 77,415 | 23.67 | 76,820 | 23.77 | 132,447 | 20.98 | 131,590 | 21.05 | 20,396 | 21.93 | 20,323 | 22.19 | 84,091 | 19.88 | 83,700 | 20.03 |
| *NORTHEAST* | 2,805 | 14.37 | 2,791 | 14.45 | 1,145 | 13.92 | 1,126 | 13.83 | 5,094 | 14.42 | 5,063 | 14.47 | 33,673 | 10.30 | 33,444 | 10.35 | 86,198 | 13.66 | 85,307 | 13.65 | 10,922 | 11.74 | 10,866 | 11.87 | 55,771 | 13.19 | 55,347 | 13.24 |
| *SOUTH* | 6,750 | 34.59 | 6,725 | 34.81 | 3,102 | 37.71 | 3,089 | 37.95 | 14,728 | 41.69 | 14,648 | 41.87 | 137,184 | 41.95 | 136,114 | 42.13 | 285,875 | 45.29 | 284,365 | 45.49 | 40,602 | 43.65 | 40,213 | 43.91 | 186,944 | 44.21 | 185,729 | 44.45 |
| *WEST* | 5,455 | 27.95 | 5,299 | 27.43 | 1,988 | 24.16 | 1,951 | 23.97 | 7,193 | 20.36 | 7,039 | 20.12 | 78,741 | 24.08 | 76,738 | 23.75 | 126,677 | 20.07 | 123,818 | 19.81 | 21,096 | 22.68 | 20,178 | 22.03 | 96,087 | 22.72 | 93,107 | 22.28 |
| **Insurance type** |  |  |  |  |  |  |  |  |  |  |  |  |  |  |  |  |  |  |  |  |  |  |  |  |  |  |  |  |
| *COMMERCIAL* | 886 | 4.52 | 870 | 4.43 | 2,827 | 34.13 | 2,813 | 33.97 | 16,045 | 45.19 | 16,004 | 45.07 | 120,472 | 36.64 | 120,082 | 36.52 | 170,069 | 26.78 | 168,964 | 26.61 | 6,609 | 7.08 | 6,502 | 6.96 | 54,155 | 12.72 | 53,555 | 12.58 |
| *MEDICARE* | 18,737 | 95.48 | 18,753 | 95.57 | 5,455 | 65.87 | 5,469 | 66.03 | 19,461 | 54.81 | 19,502 | 54.93 | 208,301 | 63.36 | 208,691 | 63.48 | 464,984 | 73.22 | 466,089 | 73.39 | 86,750 | 92.92 | 86,857 | 93.04 | 371,509 | 87.28 | 372,109 | 87.42 |

**Supplementary** **material**

**Supplementary Table 1. Pharmaceutical disease cohorts' characteristics**

AMD: age-related macular degeneration; ASCVD: atherosclerotic cardiovascular disease; CHF: chronic heart failure; MDD: major depressive disorder; MS: multiple sclerosis

|  | CLL | | | | Breast cancer | | | | Lung cancer | | | |
| --- | --- | --- | --- | --- | --- | --- | --- | --- | --- | --- | --- | --- |
|  | Pre-pandemic | | Pandemic | | Pre-pandemic | | Pandemic | | Pre-pandemic | | Pandemic | |
| Age | Total (N) | % | Total (N) | % | Total (N) | % | Total (N) | % | Total (N) | % | Total (N) | % |
| 18-29 | 3 | 0.06 | 3 | 0.06 | 51 | 0.13 | 39 | 0.10 | 826 | 0.19 | 751 | 0.18 |
| 30-39 | 12 | 0.26 | 10 | 0.22 | 446 | 1.13 | 370 | 0.95 | 2,678 | 0.63 | 2,288 | 0.54 |
| 40-49 | 63 | 1.35 | 57 | 1.23 | 2,093 | 5.31 | 1,848 | 4.73 | 9,938 | 2.34 | 8,641 | 2.05 |
| 50-59 | 276 | 5.90 | 230 | 4.96 | 4,415 | 11.21 | 4,158 | 10.64 | 34,382 | 8.08 | 30,483 | 7.25 |
| 60-69 | 1,025 | 21.91 | 906 | 19.55 | 10,412 | 26.43 | 9,181 | 23.50 | 106,749 | 25.09 | 94,530 | 22.48 |
| 70-79 | 1,978 | 42.27 | 1,967 | 42.45 | 15,095 | 38.32 | 15,606 | 39.95 | 167,938 | 39.47 | 169,882 | 40.39 |
| 80+ | 1,322 | 28.25 | 1,461 | 31.53 | 6,878 | 17.46 | 7,863 | 20.13 | 102,939 | 24.20 | 114,008 | 27.11 |
| Sex |  |  |  |  |  |  |  |  |  |  |  |  |
| FEMALE | 2,041 | 43.60 |  |  | 39,004 | 99.03 |  |  | 209,283 | 49.17 |  |  |
| MALE | 2,640 | 56.40 |  |  | 384 | 0.97 |  |  | 216,368 | 50.83 |  |  |
| Region |  |  |  |  |  |  |  |  |  |  |  |  |
| MIDWEST | 1,160 | 24.91 | 1,159 | 25.14 | 9,090 | 23.21 | 9,064 | 23.33 | 84,091 | 19.88 | 83,700 | 20.03 |
| NORTHEAST | 686 | 14.73 | 684 | 14.84 | 5,496 | 14.03 | 5,447 | 14.02 | 55,771 | 13.19 | 55,347 | 13.24 |
| SOUTH | 1,613 | 34.64 | 1,600 | 34.71 | 15,627 | 39.90 | 15,568 | 40.07 | 186,944 | 44.21 | 185,729 | 44.45 |
| WEST | 1,197 | 25.71 | 1,167 | 25.31 | 8,956 | 22.87 | 8,775 | 22.58 | 96,087 | 22.72 | 93,107 | 22.28 |
| Insurance type |  |  |  |  |  |  |  |  |  |  |  |  |
| COMMERCIAL | 612 | 13.07 | 606 | 12.95 | 8,745 | 22.20 | 8,686 | 22.05 | 54,155 | 12.72 | 53,555 | 12.58 |
| MEDICARE | 4,069 | 86.93 | 4,075 | 87.05 | 30,646 | 77.80 | 30,705 | 77.95 | 371,509 | 87.28 | 372,109 | 87.42 |

**Supplementary Table 2. Oncology disease cohorts' characteristics**

CLL: chronic lymphocytic leukemia

**Supplementary Table 3. Disease areas and ICD-10 clinical modification diagnosis codes.**

| **Disease area** | **ICD-10 code list** |
| --- | --- |
| Chronic heart failure | I50.43, I50.33, I50.813, I50.23, I50.42, I50.32, I50.812, I50.22, I13.0, I13.2 |
| Atherosclerotic cardiovascular disease | I21, I21.0, I21.01, I21.02, I21.09, I21.1, I21.11, I21.19, I21.2, I21.21, I21.29, I21.3, I21.4, I21.9, I21.A, I21.A1, I21.A9, I22, I22.0, I22.1, I22.2, I22.8, I22.9, I23.0, I23.1, I23.2, I23.3, I23.4, I23.5, I23.6, I23.7, I23.8, I25.2, I63, I63.0, I63.00, I63.01, I63.011, I63.012, I63.013, I63.019, I63.02, I63.03, I63.031, I63.032, I63.033, I63.039, I63.09, I63.1, I63.10, I63.11, I63.111, I63.112, I63.113, I63.119, I63.12, I63.13, I63.131, I63.132, I63.133, I63.139, I63.19, I63.2, I63.20, I63.21, I63.211, I63.212, I63.213, I63.219, I63.22, I63.23, I63.231, I63.232, I63.233, I63.239, I63.29, I63.3, I63.30, I63.31, I63.311, I63.312, I63.313, I63.319, I63.32, I63.321, I63.322, I63.323, I63.329, I63.33, I63.331, I63.332, I63.333, I63.339, I63.34, I63.341, I63.342, I63.343, I63.349, I63.39, I63.4, I63.40, I63.41, I63.411, I63.412, I63.413, I63.419, I63.42, I63.421, I63.422, I63.423, I63.429, I63.43, I63.431, I63.432, I63.433, I63.439, I63.44, I63.441, I63.442, I63.443, I63.449, I63.49, I63.5, I63.50, I63.51, I63.511, I63.512, I63.513, I63.519, I63.52, I63.521, I63.522, I63.523, I63.529, I63.53, I63.531, I63.532, I63.533, I63.539, I63.54, I63.541, I63.542, I63.543, I63.549, I63.59, I63.6, I63.8, I63.81, I63.89, I63.9, I70.0, I70.1, I70.201, I70.202, I70.203, I70.208, I70.209, I70.21, I70.211, I70.212, I70.213, I70.218, I70.219, I70.221, I70.222, I70.223, I70.228, I70.229, I70.231, I70.232, I70.233, I70.234, I70.235, I70.238, I70.239, I70.241, I70.242, I70.243, I70.244, I70.245, I70.248, I70.249, I70.25, I70.261, I70.262, I70.263, I70.268, I70.269, I70.291, I70.292, I70.293, I70.298, I70.299, I70.301, I70.302, I70.303, I70.308, I70.309, I70.31, I70.311, I70.312, I70.313, I70.318, I70.319, I70.321, I70.322, I70.323, I70.328, I70.329, I70.331, I70.332, I70.333, I70.334, I70.335, I70.338, I70.339, I70.341, I70.342, I70.343, I70.344, I70.345, I70.348, I70.349, I70.35, I70.361, I70.362, I70.363, I70.368, I70.369, I70.391, I70.392, I70.393, I70.398, I70.399, I70.401, I70.402, I70.403, I70.408, I70.409, I70.41, I70.411, I70.412, I70.413, I70.418, I70.419, I70.421, I70.422, I70.423, I70.428, I70.429, I70.431, I70.432, I70.433, I70.434, I70.435, I70.438, I70.439, I70.441, I70.442, I70.443, I70.444, I70.445, I70.448, I70.449, I70.45, I70.461, I70.462, I70.463, I70.468, I70.469, I70.491, I70.492, I70.493, I70.498, I70.499, I70.501, I70.502, I70.503, I70.508, I70.509, I70.51, I70.511, I70.512, I70.513, I70.518, I70.519, I70.521, I70.522, I70.523, I70.528, I70.529, I70.531, I70.532, I70.533, I70.534, I70.535, I70.538, I70.539, I70.541, I70.542, I70.543, I70.544, I70.545, I70.548, I70.549, I70.55, I70.561, I70.562, I70.563, I70.568, I70.569, I70.591, I70.592, I70.593, I70.598, I70.599, I70.601, I70.602, I70.603, I70.608, I70.609, I70.61, I70.611, I70.612, I70.613, I70.618, I70.619, I70.621, I70.622, I70.623, I70.628, I70.629, I70.631, I70.632, I70.633, I70.634, I70.635, I70.638, I70.639, I70.641, I70.642, I70.643, I70.644, I70.645, I70.648, I70.649, I70.65, I70.661, I70.662, I70.663, I70.668, I70.669, I70.691, I70.692, I70.693, I70.698, I70.699, I70.701, I70.702, I70.703, I70.708, I70.709, I70.71, I70.711, I70.712, I70.713, I70.718, I70.719, I70.721, I70.722, I70.723, I70.728, I70.729, I70.731, I70.732, I70.733, I70.734, I70.735, I70.738, I70.739, I70.741, I70.742, I70.743, I70.744, I70.745, I70.748, I70.749, I70.75, I70.761, I70.762, I70.763, I70.768, I70.769, I70.791, I70.792, I70.793, I70.798, I70.799, I70.8, I70.90, I70.91, I70.92, I20.0, I25.110, I25.700, I25.710, I25.720, I25.730, I25.750, I25.760, I25.790, I20 I20.8, I20.9, I25.11, I25.111, I25.118, I25.119, I25.7, I25.70, I25.701, I25.708, I25.709, I25.71, I25.711, I25.718, I25.719, I25.72, I25.721, I25.728, I25.729, I25.73, I25.731, I25.738, I25.739, I25.75, I25.751, I25.758, I25.759, I25.76, I25.761, I25.768, I25.769, I25.79, I25.791, I25.798, I25.799, G450, G451, G452, G453, G458, G459, G46.0, G46.1, G46.2, I67.848, I25.10, I25.810, I25.811, I25.812, I25.82, I25.83, I25.84, I65 I65.0, I65.01, I65.02, I65.03, I65.09, I65.1, I65.2, I65.21, I65.22, I65.23, I65.29, I65.8, I65.9, I66, I66.0, I66.01, I66.02, I66.03, I66.09, I66.1, I66.11, I66.12, I66.13, I66.19, I66.2, I66.21, I66.22, I66.23, I66.29, I66.3, I66.8, I66.9, I67.2 |
| High cholesterol | E78.00, E78.1, E78.2, E78.6 |
| Relapsing multiple sclerosis | G35 |
| Psoriasis | L40.50, L40.1, L40.4, L40.8, L40.0, L40.9 |
| Major depressive disorder | F33.2, F33.42, F33.41, F33.40,  F33.0, F33.1, F33.3, F33.9, F32.5, F32.4, F32.0, F32.1, F32.3, F32.2, F32.9 |
| Breast cancer | C50.011, C50.012, C50.019, C50.021, C50.022, C50.029, C50.111, C50.112, C50.119, C50.121, C50.122, C50.129, C50.211, C50.212, C50.219, C50.221, C50.222, C50.229, C50.311, C50.312, C50.319, C50.321, C50.322, C50.329, C50.411, C50.412, C50.419, C50.421, C50.422, C50.429, C50.511, C50.512, C50.519, C50.521, C50.522, C50.529, C50.611, C50.612, C50.619, C50.621, C50.622, C50.629, C50.811, C50.812, C50.819, C50.821, C50.822, C50.829, C50.911, C50.912, C50.919, C50.921, C50.922, C50.929 |
| Lung cancer | C34.00, C34.01, C34.02, C34.10, C34.11, C34.12, C34.2, C34.30, C34.31, C34.32, C34.80, C34.81, C34.82, C34.90, C34.91, C34.92 |
| Chronic lymphocytic leukemia | C91.10, C91.11, C91.12 |

ICD-10, International Classification of Diseases, Tenth Revision.

Supplementary Table 4. Total pre-pandemic and pandemic outpatient visits and the percentage change in outpatient visits for each disease area.

| **Disease area** | **Pre-pandemic** | **Pandemic** | **Change in outpatient visits (%)** |
| --- | --- | --- | --- |
| CHF | 574,399 | 520,178 | *−*9.44 |
| ASCVD | 1,831,366 | 1,670,533 | *−*8.78 |
| High cholesterol | 2,110,412 | 1,962,708 | *−*7.00 |
| MDD | 1,228,283 | 1,314,782 | 7.04 |
| Relapsing MS | 39,646 | 35,457 | *−*10.57 |
| Psoriasis | 118,735 | 116,942 | *−*1.51 |
| Wet AMD | 75,092 | 65,448 | *−*12.84 |
| Breast cancer | 257,357 | 244,118 | *−*5.14 |
| Lung cancer | 105,404 | 114,825 | 8.94 |
| CLL | 27,852 | 27,982 | 0.47 |
| *Mean* | – | – | *−3.88* |

AMD: age-related macular degeneration; ASCVD: atherosclerotic cardiovascular disease; CHF: chronic heart failure; CLL: chronic lymphocytic leukemia; MDD: major depressive disorder; MS: multiple sclerosis.

Supplementary Table 5. Total pre-pandemic and pandemic inpatient visits and the percentage change in inpatient visits for each disease area.

| **Disease area** | **Pre-pandemic** | **Pandemic** | **Change in inpatient visits (%)** |
| --- | --- | --- | --- |
| CHF | 51,644 | 51,953 | 0.60 |
| ASCVD | 111,167 | 108,396 | *−*2.49 |
| High cholesterol | 95,597 | 93,288 | *−*2.42 |
| MDD | 72,900 | 69,912 | *−*4.10 |
| Relapsing MS | 1,509 | 1,499 | *−*0.66 |
| Psoriasis | 4,682 | 4,381 | *−*6.43 |
| Wet AMD | 3,766 | 3,752 | *−*0.37 |
| Breast cancer | 6,142 | 5,905 | *−*3.86 |
| Lung cancer | 4,886 | 5,396 | 10.44 |
| CLL | 1,181 | 1,221 | 3.39 |
| *Mean* | – | – | *−0.59* |

AMD: age-related macular degeneration; ASCVD: atherosclerotic cardiovascular disease; CHF: chronic heart failure; CLL: chronic lymphocytic leukemia; MDD: major depressive disorder; MS: multiple sclerosis.

Supplementary Table 6. Total pre-pandemic and pandemic ED visits and the percentage change in ED visits for each disease area.

| **Disease area** | **Pre-pandemic** | **Pandemic** | **Change in ED visits (%)** |
| --- | --- | --- | --- |
| CHF | 80,391 | 65,463 | *−*18.57 |
| ASCVD | 248,111 | 201,555 | *−*18.76 |
| High cholesterol | 253,492 | 205,497 | *−*18.93 |
| MDD | 195,999 | 157,572 | *−*19.61 |
| Relapsing MS | 4,494 | 3,476 | *−*22.65 |
| Psoriasis | 12,833 | 10,517 | *−*18.05 |
| Wet AMD | 8,861 | 7,168 | *−*19.11 |
| Breast cancer | 15,130 | 12,091 | *−*20.09 |
| Lung cancer | 7,428 | 6,500 | *−*12.49 |
| CLL | 2,094 | 1,744 | *−*16.71 |
| *Mean* | – | – | *−18.50* |

AMD: age-related macular degeneration; ASCVD: atherosclerotic cardiovascular disease; CHF: chronic heart failure; CLL: chronic lymphocytic leukemia; MDD: major depressive disorder; MS: multiple sclerosis.
